# Supplementary material
Source: PubMed Central journal article supplement (PMC6941661)
Supplement: NIHMS1545131-supplement-2.pdf [file NIHMS1545131-supplement-2.pdf]

**Supplemental Figures and Tables**

Gilchuk IM, Bangaru S, Gilchuk P, RP, Kose N, Bombardi RG, Thornburg NJ, Creech B, Edwards KM, Li S, Turner HL, Yu W, Zhu X, Wilson IA, Ward AB, Crowe JE Jr.

Influenza H7N9 virus neuraminidase-specific human monoclonal antibodies inhibit viral egress and protect from lethal influenza infection in mice

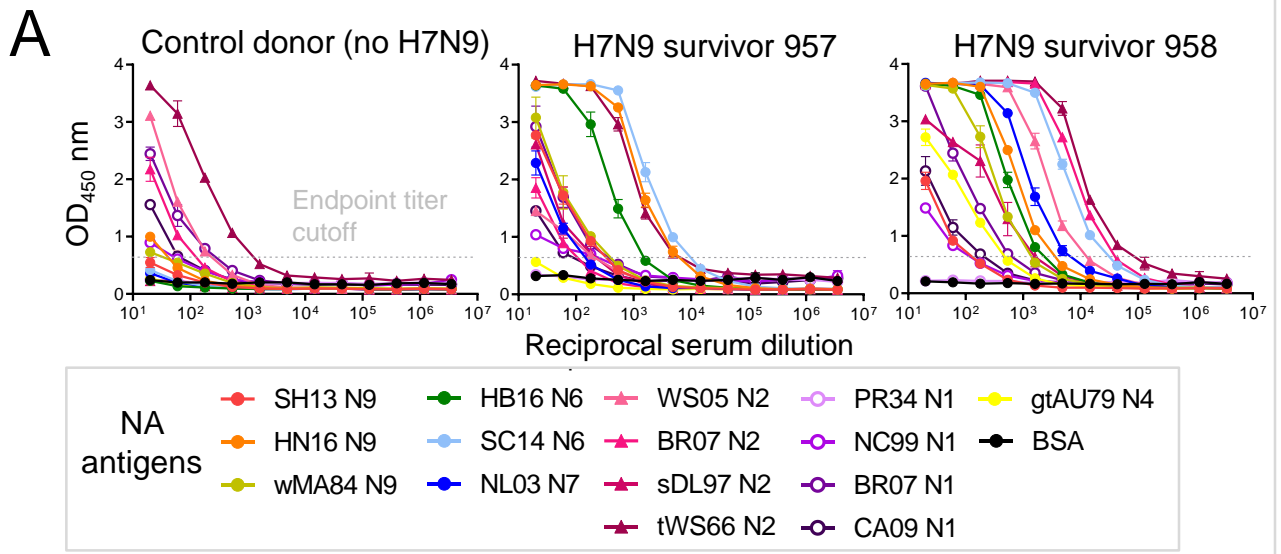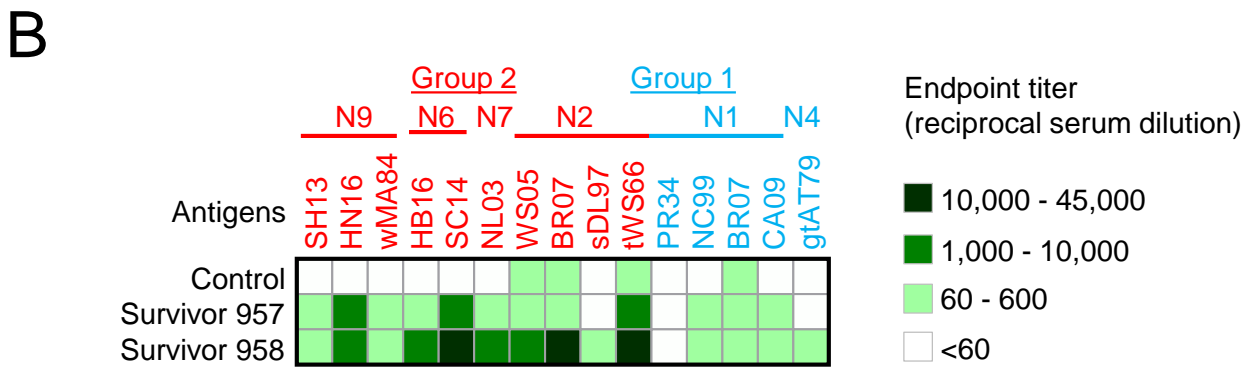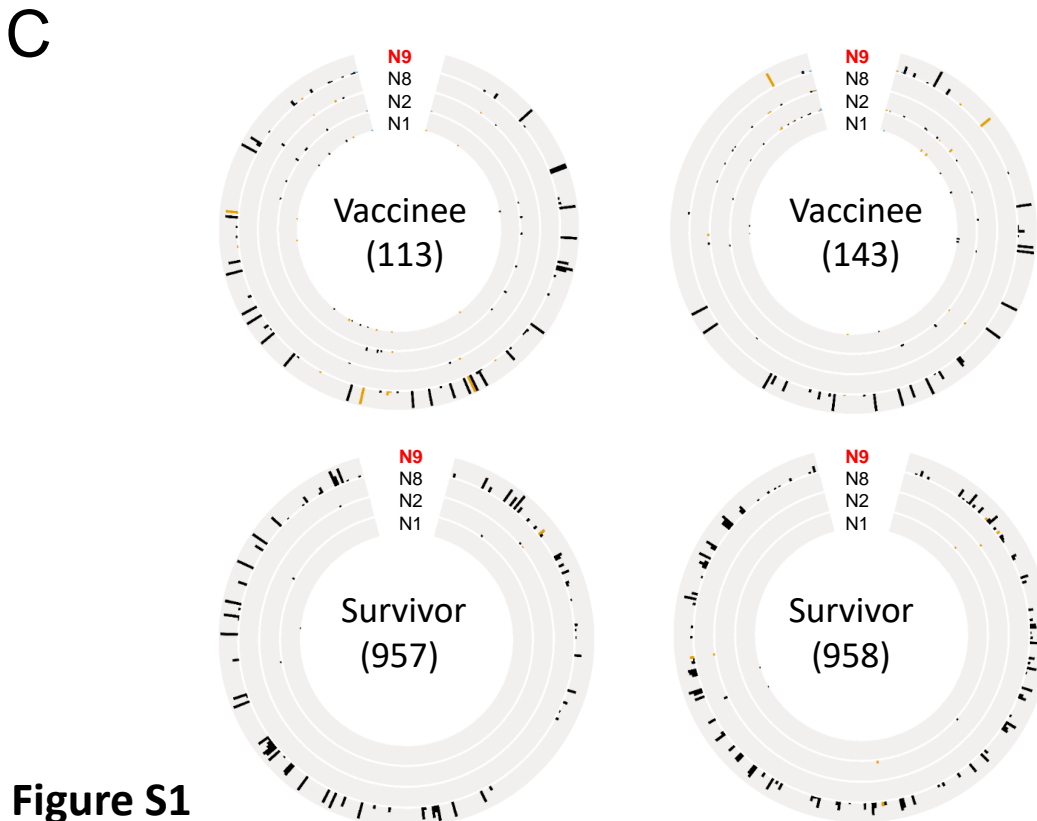

Figure S1

**Figure S1. Broad reactivity of serum and subtype-specific anti-NA responses by individual mAbs from LCL cultures. Related to Figure 1.**

Cross-reactivity of serum samples from two survivors and negative control serum (donor without exposure history to H7N9) (**A**, **B**) and LCLs (**C**) were assessed by ELISA using for binding using indicated NA antigens.

(**A**) Binding curves of diluted serum. Data shown as mean  $\pm$  SD of assay triplicates.

(**B**) Heatmap of cross-reactive activity of serum samples from (**A**).

(**C**) Circos plots of antibody cross-reactivity measured in LCL supernatants for four donors. NA antigens include SH13 N9, 2009(H1N1)pdm N1, A/Wisconsin/67/2005 (H3N2) N2, and A/Pennsylvania/1/2007 (H3N8) N8. Each circle has 384 positions, with each representing one well of a 384-well plate. Each ring represents binding to one indicated NA protein. The height of the bar represents OD 405 nm. Black, gold, aqua or coral bars indicate that a well contained IgG that bound to 1, 2, 3, or 4 NA proteins, respectively.

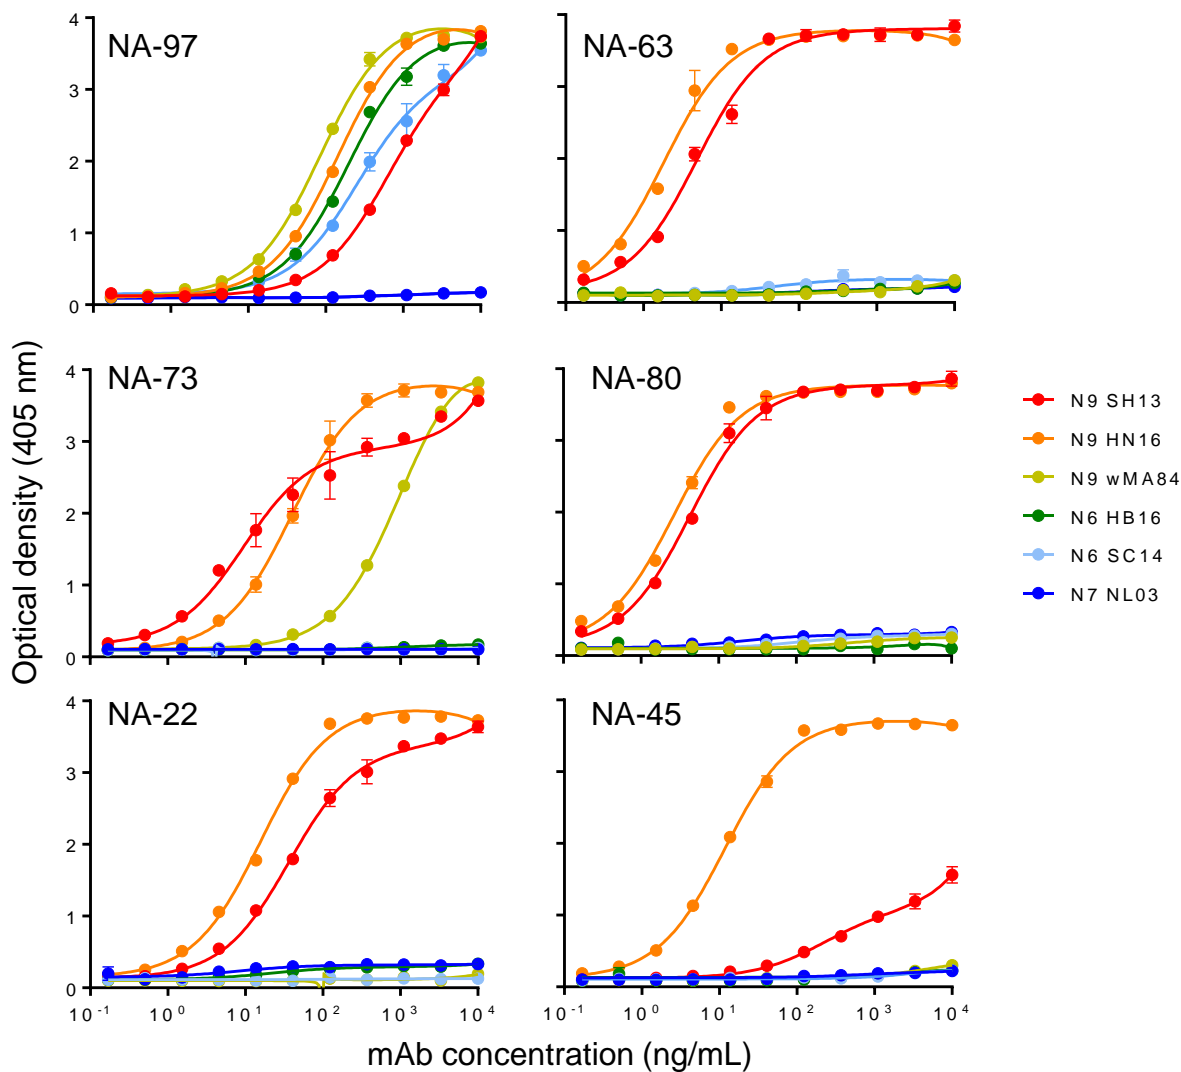

**Figure S2. Cross-reactivity of human mAbs to N9 NA. Related to Figure 2.**

Cross-reactivity of representative mAbs to different NA antigens was assessed by ELISA using purified recombinant NA antigens at a concentration of 2  $\mu\text{g}/\text{mL}$ . Data represent one of two independent experiments, shown as mean  $\pm$  SD of assay triplicates.

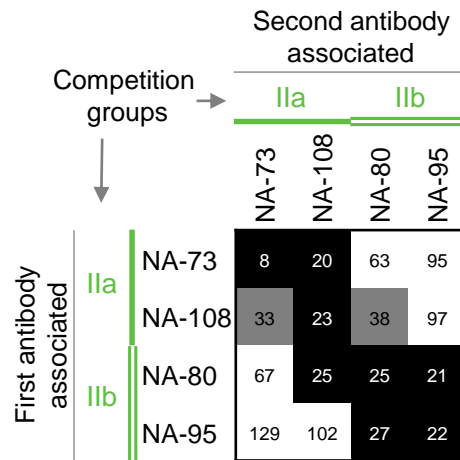

**Figure S3. MAbs from competition-binding Group II can be segregated further into subgroups IIa and IIb. Related to Figure 4.**

Four mAbs from competition-binding Group II were assessed surface plasmon resonance using a Biacore 8K instrument. MAbs were judged to compete for the same site if maximum binding of second antibody was reduced to  $\leq 39\%$  of its uncompleted binding (shown in black boxes). The mAbs were considered non-competing if maximum binding of second mAb was  $\geq 61\%$  of its uncompleted binding (shown in white boxes). Grey boxes indicate an intermediate phenotype (competition between 40% and 60% of uncompleted binding). Green lines and Roman numerals indicate inferred competition-binding groups.

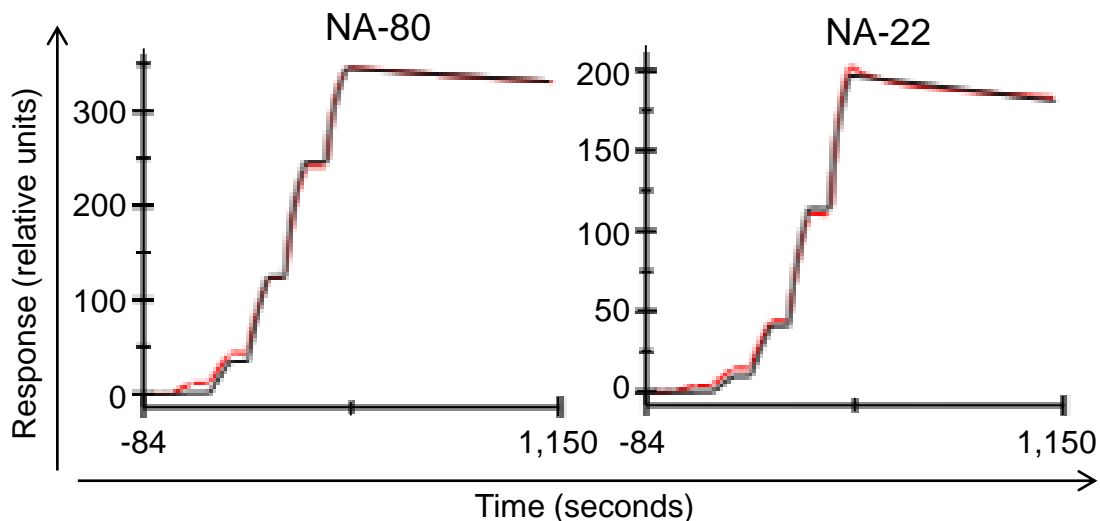

**Figure S4. Surface plasmon resonance sensorgrams of human NA-80 and NA-22 mAbs to N9 NA. Related to Figure 4.**

Binding affinity of anti-N9 mAb to N9 NA was measured using a Biacore 8K instrument (GE Healthcare Life Sciences). IgGs were captured on a Protein G sensor chip (GE Healthcare Life Sciences) with final surface densities of ~245 to 400 relative units. Kinetic measurements were performed using a single-cycle kinetics experimental setup, by injecting a 0.156  $\mu\text{g}/\text{mL}$  solution of IgG, and then bound with four-fold serial dilutions of N9 NA (starting from a 100 nM concentration). Dissociation data for IgGs were collected for 10 min. Binding data were globally fit to a bivalent analyte model using the Biacore 8K control software. This analysis determined the kinetic rate constants ( $K_{\text{on}}$ ,  $K_{\text{off}}$ ), from which the apparent  $K_{\text{D}}$  then was calculated as  $K_{\text{off}}/K_{\text{on}}$  as shown in Figure 4B. Dissociation percent indicates the percent of IgG dissociated from antigen at time of dissociation step, according to RU values.

# NA-45 mAb influence on N9 NA deuteration level

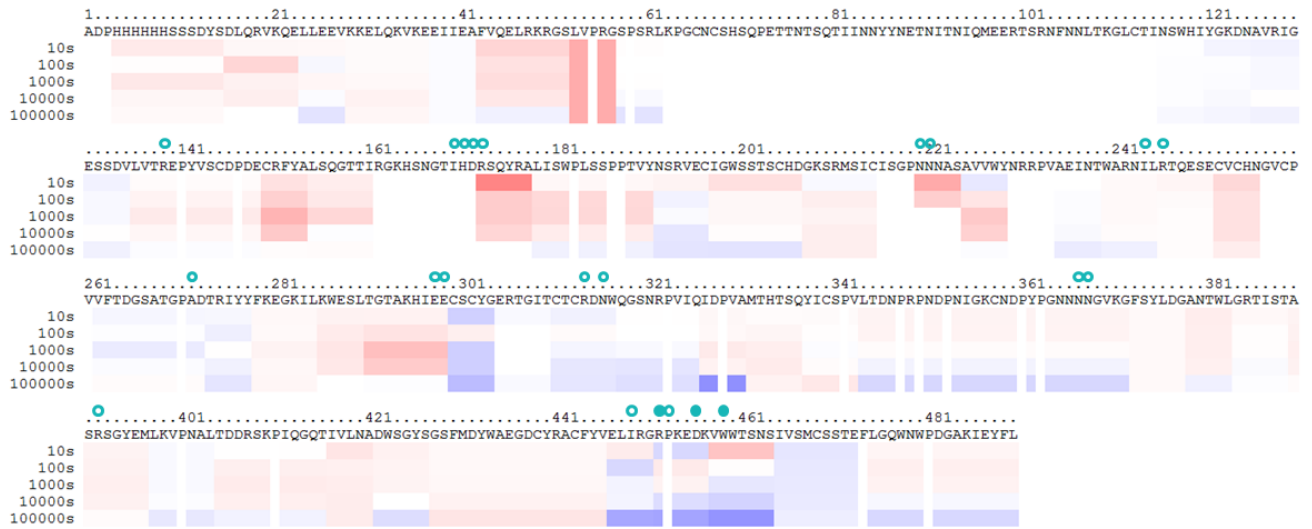

# NA-73 mAb influence on N9 NA deuteration level

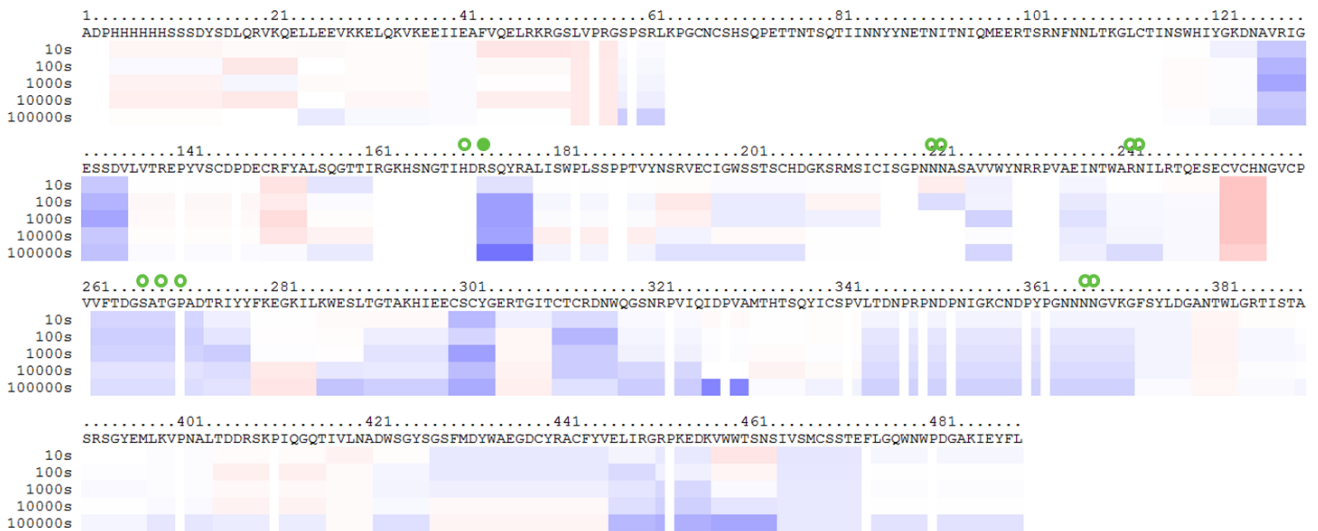

# NA-63 mAb influence on N9 NA deuteration level

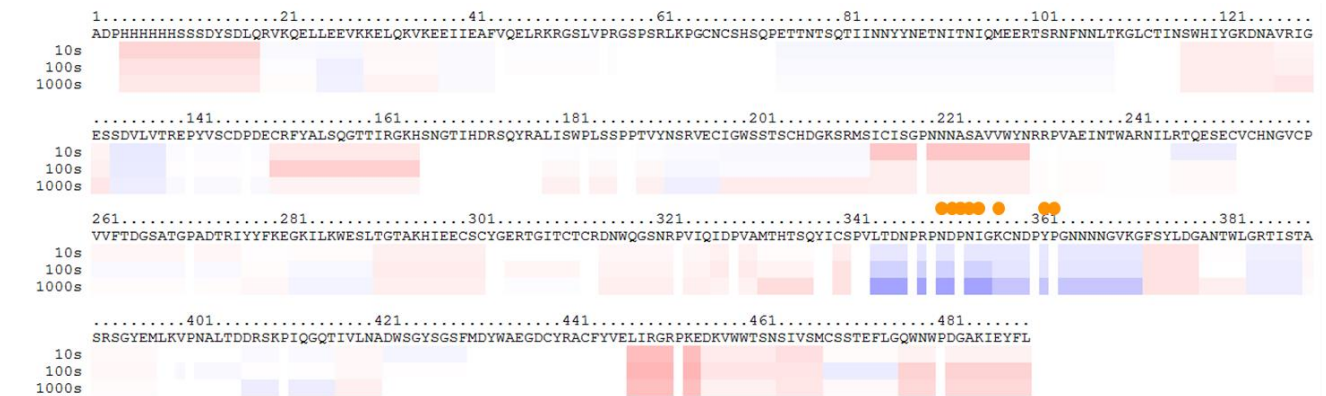

Deuteration level change (%)

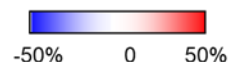

Figure S5

**Figure S5. Hydrogen deuterium exchange mass spectrometry reveals changes in deuteration level for N9 NA incubated with mAbs NA-45, NA-73, or NA-63 compared to N9 NA alone. Related to Figure 5.**

Each horizontal row indicates a separate time point. The percentage of deuterium level change is indicated as a color gradient: blue for decrease, red for increase of deuteration level. Circles indicate amino acid residues within the epitope determined by crystallography or cryo-EM reconstruction of N9-Fab complex structures for mAbs NA-45 (cyan), NA-73 (green), or NA-63 (orange) (see Zhu et al., 2019). Solid circles indicate amino acid residues with decreased deuteration level within the epitope upon mAb binding to N9 NA.



## NA-80 mAb influence on N9 NA deuteration level

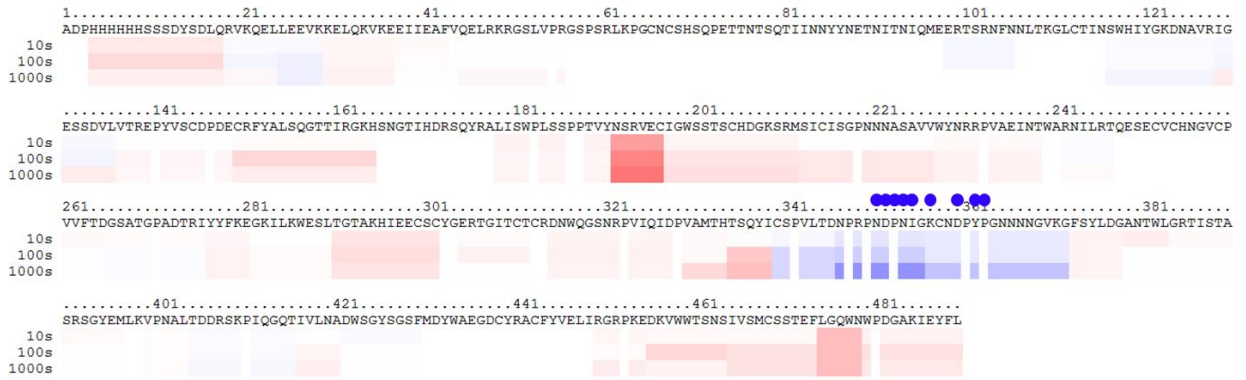

## NA-22 mAb influence on N9 NA deuteration level

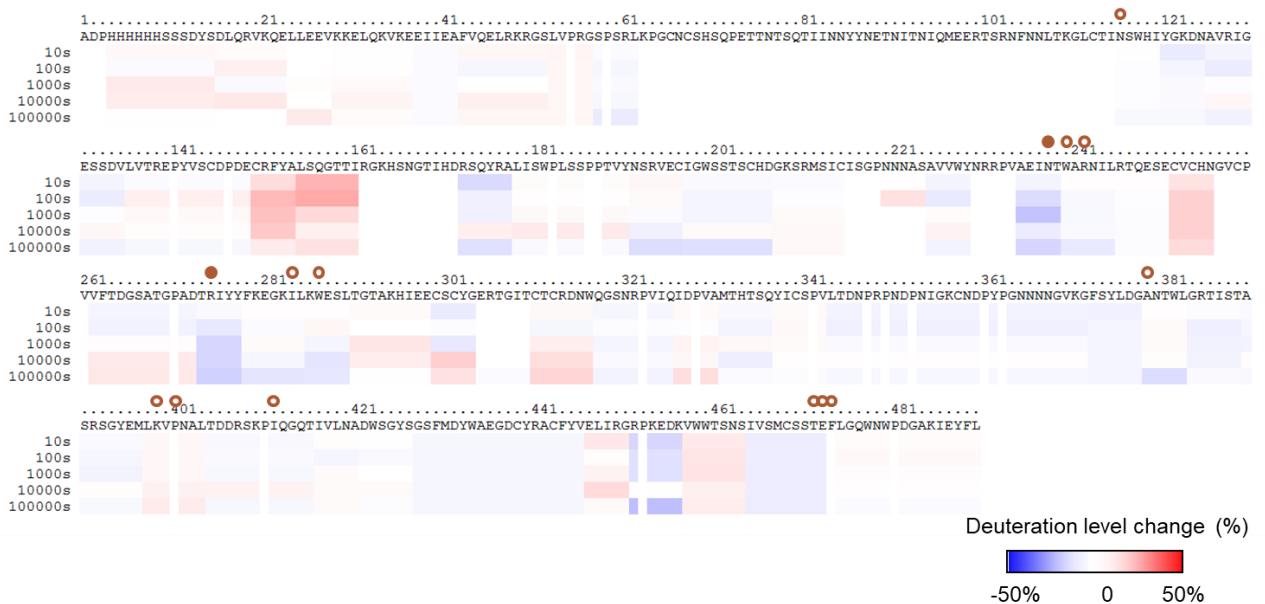

**Figure S6. Hydrogen deuterium exchange mass spectrometry reveals changes in deuteration level for N9 NA incubated with mAbs NA-80 or NA-22 compared to N9 NA alone. Related to Figure 5.**

Each horizontal row indicates a separate time point. The percentage of deuterium level change is indicated as a color gradient: blue for decrease, red for increase of deuteration level. Circles indicate amino acid residues within the epitope determined by crystallography or cryo-EM reconstruction of N9-Fab complex structures for mAbs NA-80 (blue) or NA-22 (brown) (see Zhu et al., 2019). Solid circles indicate amino acid residues with decreased deuteration level within the epitope upon mAb binding to N9 NA.

A

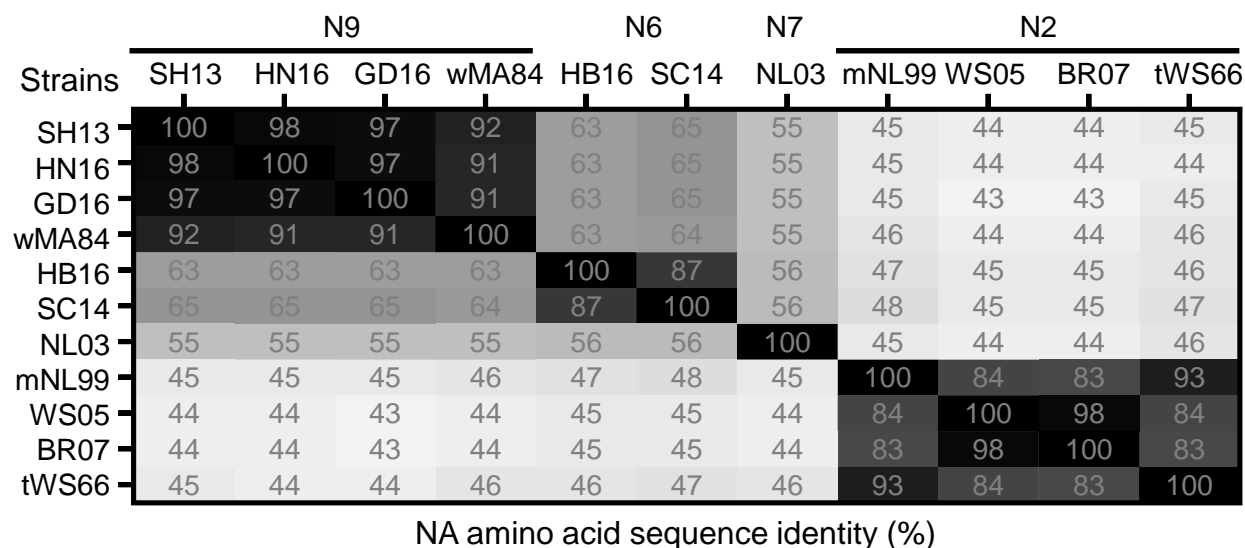

B

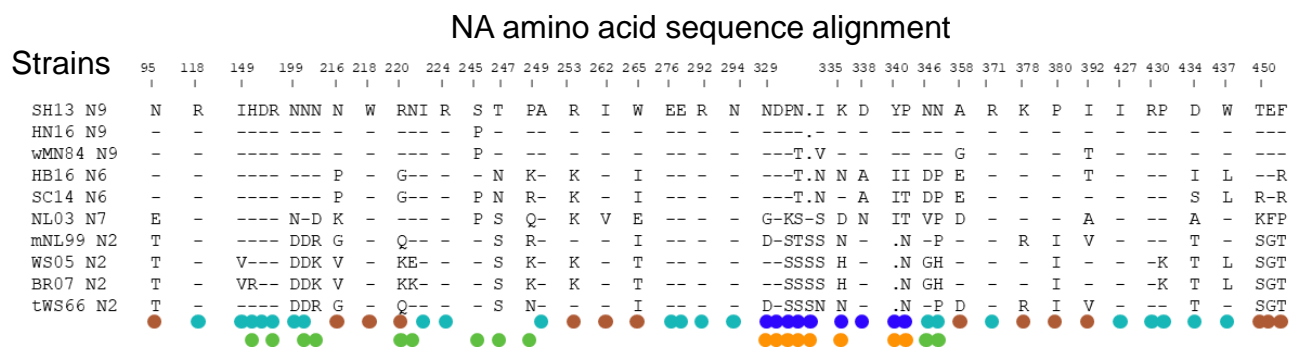

**Figure S7. Conservation of NA sequences within identified epitopes for five characterized anti-N9 NAs mAbs. Related to Figure 5**

NA amino acid sequences for N9, N6, N7 and N2 NAs are shown.

(A) Heatmap showing amino acid identity for indicated pairwise comparisons of NA proteins.

(B) Alignment of NAs amino acid sequences within epitopes of NA-45, NA-73, NA-63, NA-80

and NA-22 mAbs. Circles indicate amino acid residues within the epitope determined by crystallography or cryo-EM reconstruction of N9-Fab complex structures for mAbs NA-45

(cyan), NA-73 (green), NA-63 (orange), NA-80 (blue) or NA-22 (brown) as described (Zhu et al., 2019).

**SUPPLEMENTAL TABLES**

**Table S1. Generation of human B cell hybridomas from PBMCs of H7N9-immunized subjects or from subjects who had a history of naturally acquired H7N9 infection, Related to Figure 1**

| Donor | Vaccine formulation<br>(hemagglutinin amount, µg +<br>adjuvant) |                      | Vaccine or infection                                            | Time post-<br>exposure<br>when blood<br>was taken         | Frequency of H7N9<br>reactive EBV-transformed<br>lymphoblastoid cell lines<br>(LCLs) (%) |                   | Number of individual<br>N9-reactive hybridomas<br>generated from sample |
|-------|-----------------------------------------------------------------|----------------------|-----------------------------------------------------------------|-----------------------------------------------------------|------------------------------------------------------------------------------------------|-------------------|-------------------------------------------------------------------------|
|       | prime<br>vaccination                                            | boost<br>vaccination |                                                                 |                                                           | H7 HA<br>reactive                                                                        | N9 NA<br>reactive |                                                                         |
| 231   | 15 + AS03                                                       | 15 + AS03            | Monovalent<br>inactivated H7N9<br>A/Shanghai/02/2013<br>vaccine | Day 42<br><br>(21 days after<br>the boost<br>vaccination) | 1.33                                                                                     | 1.45              | 0                                                                       |
| 113   | 15 + AS03                                                       | 15 + AS03            |                                                                 |                                                           | 1.41                                                                                     | 0.81              | 13                                                                      |
| 169   | 15 +AS03                                                        | 15                   |                                                                 |                                                           | 2.21                                                                                     | 0.59              | 0                                                                       |
| 166   | 3.75 + AS03                                                     | 3.75 + AS03          |                                                                 |                                                           | 0.63                                                                                     | 0.46              | 0                                                                       |
| 143   | 7.5 + AS03                                                      | 7.5 + AS03           |                                                                 |                                                           | 0.70                                                                                     | 0.32              | 3                                                                       |
| 155   | 7.5 + AS03                                                      | 7.5 + AS03           |                                                                 |                                                           | 0.03                                                                                     | 0.88              | 0                                                                       |
| 100   | 15 + AS03                                                       | 15 + AS03            |                                                                 |                                                           | 0.08                                                                                     | 0.74              | 0                                                                       |
| 220   | 15                                                              | 15 +AS03             |                                                                 |                                                           | 0.00                                                                                     | 0.64              | 0                                                                       |
| 148   | 15 + MF59                                                       | 15 + AS03            |                                                                 |                                                           | 0.10                                                                                     | 0.51              | 0                                                                       |
| 076   | 15 + MF59                                                       | 15 + MF59            |                                                                 |                                                           | 0.05                                                                                     | 0.4               | 0                                                                       |
| 051   | 15 + AS03                                                       | 15 + MF59            |                                                                 |                                                           | 0.08                                                                                     | 0.34              | 0                                                                       |
| 069   | 15 + AS03                                                       | 15 + MF59            |                                                                 |                                                           | 0.10                                                                                     | 0.32              | 0                                                                       |
| 201   | 15 + MF59                                                       | 15 + AS03            |                                                                 |                                                           | 2.57                                                                                     | 0.00              | 0                                                                       |
| 212   | 45                                                              | 45                   |                                                                 |                                                           | 1.51                                                                                     | 0.00              | 0                                                                       |
| 196   | 15 + MF59                                                       | 15 + MF59            |                                                                 |                                                           | 1.37                                                                                     | 0.05              | 0                                                                       |
| 198   | 7.5 + AS03                                                      | 7.5 + AS03           |                                                                 |                                                           | 0.87                                                                                     | 0.00              | 0                                                                       |
| 211   | 15 + MF59                                                       | 15 + AS03            |                                                                 |                                                           | 0.61                                                                                     | 0.00              | 0                                                                       |
| 158   | 15 +AS03                                                        | 15                   |                                                                 |                                                           | 0.08                                                                                     | 0.15              | 0                                                                       |
| 238   | 15 + MF59                                                       | 15 + MF59            |                                                                 |                                                           | 0.09                                                                                     | 0.11              | 0                                                                       |
| 174   | 3.75 + AS03                                                     | 3.75 + AS03          |                                                                 |                                                           | 0.02                                                                                     | 0.10              | 0                                                                       |
| 079   | 45                                                              | 45                   |                                                                 |                                                           | 0.02                                                                                     | 0.05              | 0                                                                       |
| 193   | 7.5 + AS03                                                      | 7.5 + AS03           |                                                                 |                                                           | 0.21                                                                                     | 0.04              | 0                                                                       |
| 072   | 7.5 + AS03                                                      | 7.5 + AS03           |                                                                 |                                                           | 0.16                                                                                     | 0.06              | 0                                                                       |
| 135   | 15                                                              | 15                   |                                                                 |                                                           | 0.09                                                                                     | 0.00              | 0                                                                       |
| 067   | 15                                                              | 15                   |                                                                 |                                                           | 0.04                                                                                     | 0.00              | 0                                                                       |
| 177   | 15 + AS03                                                       | 15                   |                                                                 |                                                           | 0.01                                                                                     | 0.00              | 0                                                                       |
| 225   | 15 + AS03                                                       | 15                   |                                                                 |                                                           | 0.01                                                                                     | 0.00              | 0                                                                       |
| 101   | 15 + AS03                                                       | 15 + AS03            | 0.00                                                            | 0.00                                                      | 0                                                                                        |                   |                                                                         |
| 130   | 45                                                              | 45                   | 0.00                                                            | 0.00                                                      | 0                                                                                        |                   |                                                                         |
| 141   | 15                                                              | 15 +AS03             | 0.00                                                            | 0.00                                                      | 0                                                                                        |                   |                                                                         |
| 957   | Not applicable                                                  |                      | H7N9 (A/British<br>Columbia/1/2015)<br>infection                | ~11 months                                                | 0.38                                                                                     | 0.56              | 11                                                                      |
| 958   |                                                                 |                      |                                                                 |                                                           | 1.45                                                                                     | 0.86              | 8                                                                       |

**Table S2. Sequence diversity of antibody variable genes encoding N9-specific mAbs, Related to Figure 1**

| Donor  | mAb    | Heavy chain variable gene sequence |                                                                    |                     |                     |                         |                  | Light chain variable gene sequence |                                                                    |                     |                        |                  |
|--------|--------|------------------------------------|--------------------------------------------------------------------|---------------------|---------------------|-------------------------|------------------|------------------------------------|--------------------------------------------------------------------|---------------------|------------------------|------------------|
|        |        | V <sub>H</sub> gene                | V <sub>H</sub> region nucleotide % homology to V <sub>H</sub> gene | D <sub>H</sub> gene | J <sub>H</sub> gene | HCDR3 amino acids (aa)  | CDR3 length (aa) | V <sub>L</sub> gene                | V <sub>L</sub> region nucleotide % homology to V <sub>L</sub> gene | J <sub>L</sub> gene | LCDR3 amino acids (aa) | CDR3 length (aa) |
| 143    | NA-3   | 3-9                                | 98.7                                                               | 6-19                | 3                   | AKDKGSSDWFPAFDI         | 15               | 1-44                               | 98.9                                                               | 3                   | AAWDDSLNGPV            | 11               |
|        | NA-4   | 3-30-3                             | 98.6                                                               | 6-19                | 3                   | ARDPLPVSSGWYRDDAFDI     | 19               | ND                                 | ND                                                                 | ND                  | ND                     | ND               |
|        | NA-5   | 3-30                               | 98.6                                                               | 3-22                | 6                   | ARGPSLTYYYYSSGQTSYGMDV  | 22               | 2-14                               | 97.6                                                               | 3                   | SSYTSSTWV              | 10               |
| 113    | NA-16  | 3-48                               | 100                                                                | 6-13                | 4                   | ARDRGYSNSWYTDY          | 14               | 3-20                               | 99.6                                                               | 3                   | QQYGSSP                | 7                |
|        | NA-17  | ND                                 | ND                                                                 | ND                  | ND                  | ND                      | ND               | 3-15                               | 94.9                                                               | 2                   | QQYNQWPYT              | 9                |
|        | NA-22* | 3-30                               | 99.3                                                               | 3-22                | 4                   | AKDKRFITMILVGPFDY       | 17               | 2-14                               | 97.2                                                               | 1                   | SSYTSSTNV              | 10               |
|        | NA-37  | 3-15                               | 97.9                                                               | 3-9                 | 4                   | TTDGLGLVWFEGEY          | 14               | 1-44                               | 99.3                                                               | 3                   | AAWDDSLNGWV            | 11               |
|        | NA-45  | 4-39                               | 98.9                                                               | 1-26                | 5                   | ARDPGLIEWELSVLSNWFDP    | 19               | 1-51                               | 98.9                                                               | 1                   | GTWDTSLSAYV            | 11               |
|        | NA-55  | 3-53                               | 98.9                                                               | 2-15                | 5                   | ARSPYCDGGSLPT           | 14               | ND                                 | ND                                                                 | ND                  | ND                     | ND               |
|        | NA-63  | 3-7                                | 98.9                                                               | 6-13                | 4                   | ASSTAAEFFDY             | 11               | 1-39 or 1D-39                      | 97.1                                                               | 2                   | QQSYSTPLYT             | 10               |
|        | NA-69* | 3-30                               | 99.3                                                               | 3-22                | 4                   | AKDKRFITMLVVGPFY        | 17               | 2-14                               | 98.3                                                               | 1                   | SSYTSSTNV              | 10               |
|        | NA-73  | 4-38-2                             | 95.1                                                               | 2-2                 | 6                   | ARDPSFWSSTSRTPYYGMDV    | 22               | 1-44                               | 98.9                                                               | 3                   | AAWDDNLNGWV            | 11               |
|        | NA-77  | 1-69 or 1-69D                      | 99.6                                                               | 6-19                | 6                   | ARGGIAVAYTALNPTYYYYMDV  | 23               | 2D-29                              | 99.7                                                               | 3                   | MQIIQLPPGFT            | 11               |
|        | NA-80  | 1-18                               | 98.6                                                               | 6-19                | 4                   | ARVPGTAVDYFDY           | 14               | 1-39 or 1D-39                      | 97.5                                                               | 3                   | QQSYSAPFT              | 9                |
|        | NA-81  | 5-10-1                             | 98.7                                                               | 3-10                | 2                   | ARHVRPNWYFDL            | 12               | 3-15                               | 98.2                                                               | 1                   | QQFNNWPLT              | 9                |
|        | NA-86  | 4-61                               | 98.3                                                               | 6-13                | 6                   | ARAPIVAADYGMDV          | 14               | 1-39 or 1D-39                      | 96.8                                                               | 2                   | QQSYNTLMYT             | 10               |
| 957    | NA-89  | 3-30                               | 96.5                                                               | 5-24                | 6                   | ARDALQLRWLYYYMDV        | 17               | 3-11                               | 99.3                                                               | 3                   | GTWDDSLSAGV            | 11               |
|        | NA-93  | 3-30                               | 95.8                                                               | 3-3                 | 6                   | ARDLFFRSNYFMDV          | 15               | 1-51                               | 97.5                                                               | 3                   | GTWDDSLSAWV            | 11               |
|        | NA-95  | 3-21                               | 95.1                                                               | 6-13                | 3                   | AMTYLAETVDAFDI          | 14               | ND                                 | ND                                                                 | ND                  | ND                     |                  |
|        | NA-97  | 3-30                               | 92.7                                                               | 3-22                | 4                   | ARDLKRYYYDTSGDLNDF      | 19               | 3-11                               | 98.6                                                               | 3                   | QQRSNWLLT              | 9                |
|        | NA-108 | 4-61                               | 95.5                                                               | 3-22                | 3                   | ARDLYYYDSSAFYAFDI       | 18               | 3-15                               | 97.8                                                               | 2                   | QQYNDWPSYT             | 10               |
|        | NA-110 | 3-53                               | 95.8                                                               | 3-22                | 4                   | ARSNGYKRYFDY            | 13               | 1-33 or 1D-33                      | ND                                                                 | 3                   | QQYHNLPHT              | 9                |
|        | NA-111 | 3-33                               | 92.4                                                               | 5-12                | 4                   | AKDLLWLRSIIGCPDV        | 16               | 1-51                               | 95.1                                                               | 3                   | GTWDDSLSAWV            | 11               |
|        | NA-121 | 4-31                               | 95.9                                                               | 4-17                | 1                   | ARGPTEEFFHQ             | 11               | 1-39 or 1D-39                      | 94.9                                                               | 3                   | QQSYSPPT               | 9                |
|        | NA-126 | 1-18                               | 96.2                                                               | 3-3                 | 4                   | ARDHRFLKWLFPPLDY        | 17               | 1-47                               | 97.5                                                               | 3                   | AAWDDSLSAWM            | 11               |
|        | NA-127 | 1-18                               | 94.1                                                               | 2-2                 | 5                   | ARDRIVCNKTSYMPRWTPYWFDP | 24               | 3-11                               | 97.8                                                               | 4                   | QQRSNRPLT              | 9                |
| 958    | NA-144 | 7-4-1                              | 97.9                                                               | 3-3                 | 3                   | AGSQAGFFLGAFDI          | 14               | 3-20                               | 98.6                                                               | 1                   | QQYGSSPPT              | 9                |
|        | NA-148 | 3-30                               | 95.5                                                               | 3-9                 | 6                   | ARILNLLRSVDWAMGDYGMVDV  | 21               | 1-51                               | 96.1                                                               | 3                   | GTWDDSLGAWV            | 11               |
|        | NA-152 | ND                                 | ND                                                                 | ND                  | ND                  | ND                      | ND               | 1-39 or 1D-39                      | 97.5                                                               | 1                   | QQSFSPLT               | 9                |
|        | NA-157 | 4-59                               | 91.9                                                               | 3-10                | 4                   | ARDVGGPYFFDY            | 12               | 1-39 or 1D-39                      | 94.6                                                               | 4                   | QQSYNTPLT              | 9                |
|        | NA-164 | 5-51                               | 97.2                                                               | 3-9                 | 5                   | ARLTPRLVIMGGNWFDP       | 17               | 1-39 or 1D-39                      | 98.9                                                               | 3                   | QQSYTTPRFT             | 10               |
|        | NA-171 | 1-69                               | 92.0                                                               | 6-19                | 4                   | ARNFYPGYLQY             | 16               | ND                                 | ND                                                                 | ND                  | ND                     | ND               |
|        | NA-175 | 1-69                               | 95.5                                                               | 6-19                | 3                   | AKEACGGDCYSNYFHY        | 12               | 2-8                                | 92.4                                                               | 1                   | CSLAGSNNFV             | 10               |
|        | NA-177 | ND                                 | ND                                                                 | ND                  | ND                  | ARVPCGGDCYSGYLQH        | ND               | 3-20                               | 98.2                                                               | 4                   | QQYGSSPPT              | 8                |
| NA-181 | 1-46   | 99.6                               | D4-17                                                              | 5                   | ARVGAVRIAAAAPDY     | 15                      | ND               | ND                                 | ND                                                                 | ND                  | ND                     |                  |

ND - not determined

\* - indicates clonally related mAbs

**Table S3. Cross-reactivity of serum samples from H7N9 survivors and control donor, Related to Figure S1**

| Donor   | Binding, Endpoint titer (reciprocal serum dilution) |      |       |      |       |      |      |       |       |       |                          |      |      |      |        |
|---------|-----------------------------------------------------|------|-------|------|-------|------|------|-------|-------|-------|--------------------------|------|------|------|--------|
|         | NA antigens from Group 2                            |      |       |      |       |      |      |       |       |       | NA antigens from Group 1 |      |      |      |        |
|         | N9                                                  |      |       | N6   |       | N7   | N2   |       |       |       | N1                       |      |      |      | N4     |
|         | SH13                                                | HN16 | wMA84 | HB16 | SC14  | NL03 | WS05 | BR07  | sDL97 | tWS66 | PR34                     | NC99 | BR07 | CA09 | gtAT79 |
| Control | 20                                                  | 20   | 20    | <    | <     | <    | 180  | 60    | <     | 1620  | <                        | 60   | 180  | 60   | <      |
| 957     | 180                                                 | 4860 | 180   | 1620 | 4860  | 60   | 180  | 60    | 180   | 4860  | <                        | 60   | 180  | 60   | <      |
| 958     | 60                                                  | 1620 | 540   | 1620 | 14580 | 4860 | 4860 | 14580 | 540   | 43740 | <                        | 60   | 540  | 180  | 180    |

The > symbol indicates endpoint titer less than 1/20

**Table S4. Cross-reactivity of anti-N9 mAbs, Related to Figure 2**

| Donor | mAb    | Binding, EC <sub>50</sub> (ng/mL) |            |            |      |       |      |      |      |       |      |      |       |                          |      |      |      |      |        |       |
|-------|--------|-----------------------------------|------------|------------|------|-------|------|------|------|-------|------|------|-------|--------------------------|------|------|------|------|--------|-------|
|       |        | NA antigens from Group 2          |            |            |      |       |      |      |      |       |      |      |       | NA antigens from Group 1 |      |      |      |      |        |       |
|       |        | N9                                |            |            |      |       | N6   |      | N7   | N2    |      |      |       |                          | N1   |      |      |      | N4     | N8    |
|       |        | SH13                              | SH13 E119V | SH13 R292K | HN16 | wMA84 | HB16 | SC14 | NL03 | mNL99 | WS05 | BR07 | sDL97 | tWS66                    | PR34 | NC99 | BR07 | CA09 | grAT79 | ePS07 |
| 957   | NA-97  | 865                               | 110        | 121        | 133  | 76    | 189  | 332  | >    | >     | >    | >    | >     | >                        | >    | >    | >    | >    | >      |       |
| 958   | NA-171 | 2                                 | 2          | 3          | 3    | 2     | >    | >    | >    | >     | >    | >    | >     | >                        | >    | >    | >    | >    | >      |       |
| 957   | NA-95  | 5                                 | 3          | 3          | 5    | 3     | >    | >    | >    | >     | >    | >    | >     | >                        | >    | >    | >    | >    | >      |       |
|       | NA-108 | 12                                | 3          | 3          | 3    | 36    | >    | >    | >    | >     | >    | >    | >     | >                        | >    | >    | >    | >    | >      |       |
|       | NA-127 | 4                                 | 4          | 6          | 7    | 36    | >    | >    | >    | >     | >    | >    | >     | >                        | >    | >    | >    | >    | >      |       |
| 958   | NA-175 | 27                                | 7          | 8          | 12   | 12    | >    | >    | >    | >     | >    | >    | >     | >                        | >    | >    | >    | >    | >      |       |
| 957   | NA-144 | 6                                 | 3          | 2          | 3    | 2     | >    | >    | >    | >     | >    | >    | >     | >                        | >    | >    | >    | >    | >      |       |
|       | NA-110 | 11                                | 11         | 12         | 12   | 12    | >    | >    | >    | >     | >    | >    | >     | >                        | >    | >    | >    | >    | >      |       |
| 958   | NA-164 | 8                                 | 7          | 8          | 10   | 17    | >    | >    | >    | >     | >    | >    | >     | >                        | >    | >    | >    | >    | >      |       |
| 113   | NA-16  | 7                                 | 9          | 10         | 8    | 15    | >    | >    | >    | >     | >    | >    | >     | >                        | >    | >    | >    | >    | >      |       |
|       | NA-37  | 114                               | 3          | 4          | 5    | 6     | >    | >    | >    | >     | >    | >    | >     | >                        | >    | >    | >    | >    | >      |       |
| 957   | NA-111 | 30                                | 31         | 26         | 22   | 90    | >    | >    | >    | >     | >    | >    | >     | >                        | >    | >    | >    | >    | >      |       |
| 113   | NA-73  | 15                                | 5          | 6          | 37   | 885   | >    | >    | >    | >     | >    | >    | >     | >                        | >    | >    | >    | >    | >      |       |
| 958   | NA-157 | 27                                | 12         | 12         | 10   | 11    | >    | >    | >    | >     | >    | >    | >     | >                        | >    | >    | >    | >    | >      |       |
| 957   | NA-89  | 10                                | 12         | 14         | 9    | 77    | >    | >    | >    | >     | >    | >    | >     | >                        | >    | >    | >    | >    | >      |       |
| 113   | NA-86  | 6                                 | 5          | 5          | 6    | >     | >    | >    | >    | >     | >    | >    | >     | >                        | >    | >    | >    | >    | >      |       |
|       | NA-80  | 4                                 | 2          | 3          | 3    | >     | >    | >    | >    | >     | >    | >    | >     | >                        | >    | >    | >    | >    | >      |       |
|       | NA-55  | 6                                 | 5          | 5          | 6    | >     | >    | >    | >    | >     | >    | >    | >     | >                        | >    | >    | >    | >    | >      |       |
|       | NA-77  | 14                                | 10         | 9          | 8    | >     | >    | >    | >    | >     | >    | >    | >     | >                        | >    | >    | >    | >    | >      |       |
| 957   | NA-93  | 9                                 | 8          | 7          | 10   | >     | >    | >    | >    | >     | >    | >    | >     | >                        | >    | >    | >    | >    | >      |       |
| 958   | NA-148 | 9                                 | 11         | 12         | 11   | >     | >    | >    | >    | >     | >    | >    | >     | >                        | >    | >    | >    | >    | >      |       |
| 113   | NA-17  | 17                                | 14         | 15         | 20   | >     | >    | >    | >    | >     | >    | >    | >     | >                        | >    | >    | >    | >    | >      |       |
| 957   | NA-126 | 32                                | 20         | 22         | 24   | >     | >    | >    | >    | >     | >    | >    | >     | >                        | >    | >    | >    | >    | >      |       |
| 113   | NA-63  | 10                                | 3          | 2          | 2    | >     | >    | >    | >    | >     | >    | >    | >     | >                        | >    | >    | >    | >    | >      |       |
| 143   | NA-3   | 11                                | 5          | 4          | 4    | >     | >    | >    | >    | >     | >    | >    | >     | >                        | >    | >    | >    | >    | >      |       |
|       | NA-5   | 10                                | 8          | 7          | 5    | >     | >    | >    | >    | >     | >    | >    | >     | >                        | >    | >    | >    | >    | >      |       |
| 113   | NA-69  | 20                                | 7          | 5          | 4    | >     | >    | >    | >    | >     | >    | >    | >     | >                        | >    | >    | >    | >    | >      |       |
|       | NA-81  | 17                                | 25         | 19         | 13   | >     | >    | >    | >    | >     | >    | >    | >     | >                        | >    | >    | >    | >    | >      |       |
|       | NA-22  | 42                                | 16         | 14         | 15   | >     | >    | >    | >    | >     | >    | >    | >     | >                        | >    | >    | >    | >    | >      |       |
| 143   | NA-4   | 86                                | 55         | 38         | 24   | >     | >    | >    | >    | >     | >    | >    | >     | >                        | >    | >    | >    | >    | >      |       |
| 113   | NA-45* | >                                 | >          | >          | 11   | >     | >    | >    | >    | >     | >    | >    | >     | >                        | >    | >    | >    | >    | >      |       |
| 958   | NA-181 | >                                 | 623        | 321        | 235  | >     | >    | >    | >    | >     | >    | >    | >     | >                        | >    | >    | >    | >    | >      |       |
|       | NA-177 | >                                 | >          | >          | >    | >     | >    | >    | >    | >     | >    | >    | >     | >                        | >    | >    | >    | >    | >      |       |
| 957   | NA-121 | >                                 | >          | >          | >    | >     | >    | >    | >    | >     | >    | >    | >     | >                        | >    | >    | >    | >    | >      |       |
| 958   | NA-152 | >                                 | ND         | ND         | ND   | ND    | ND   | ND   | >    | >     | >    | >    | >     | >                        | >    | >    | >    | >    | >      |       |

ND indicates not determined. The > symbol indicates binding was not detected when tested at concentrations as high as 10 µg/mL

\* NA-45 binds SH13 N9 NA but EC<sub>50</sub> value is impossible to define since concentration response curve do not reach maximum at tested concentrations. See Figure S1.

**Table S5. Neutralizing activity of anti-N9 mAbs, Related to Figure 3**

| Donor    | mAb       | HAI                                            | Egress inhibition assay | ELLA NI assay         | NA-Fluor NI assay     |
|----------|-----------|------------------------------------------------|-------------------------|-----------------------|-----------------------|
|          |           | Effective endpoint antibody concentration (nM) |                         | IC <sub>50</sub> (nM) | IC <sub>50</sub> (nM) |
| 957      | NA-108    | ND                                             | ND                      | 0.11                  | 0.54                  |
| 113      | NA-73     | >                                              | 0.21                    | 0.21                  | 3                     |
| 113      | NA-80     | >                                              | <0.03                   | 0.08                  | >                     |
| 957      | NA-95     | >                                              | <0.03                   | 0.19                  | >                     |
| 113      | NA-63     | >                                              | 0.09                    | 0.40                  | >                     |
| 113      | NA-77     | >                                              | 0.27                    | 0.62                  | >                     |
| 957      | NA-127    | >                                              | 0.27                    | 0.63                  | >                     |
| 113      | NA-45*    | >                                              | 0.27                    | 0.79                  | >                     |
| 958      | NA-171    | >                                              | 0.21                    | 2.72                  | >                     |
| 113      | NA-55     | >                                              | 0.45                    | 0.28                  | >                     |
| 113      | NA-69     | >                                              | 0.81                    | 0.38                  | >                     |
| 143      | NA-5      | >                                              | 0.81                    | 0.47                  | >                     |
| 113      | NA-22     | >                                              | 0.81                    | 0.63                  | >                     |
| 113      | NA-17     | >                                              | 0.81                    | 0.86                  | >                     |
| 143      | NA-3      | >                                              | 1.36                    | 1.01                  | >                     |
| 958      | NA-181    | >                                              | 1.37                    | 1.72                  | >                     |
| 113      | NA-86     | >                                              | 1.37                    | 1.73                  | >                     |
| 143      | NA-4      | >                                              | 2.47                    | 0.79                  | >                     |
| 957      | NA-93     | >                                              | 1.92                    | 2.31                  | >                     |
| 958      | NA-157    | >                                              | 2.47                    | 4.16                  | >                     |
| 957      | NA-89     | >                                              | 1.92                    | 4.64                  | >                     |
| 957      | NA-110    | >                                              | 2.47                    | 20.59                 | >                     |
| 958      | NA-148    | >                                              | 17.3                    | 1.17                  | >                     |
| 957      | NA-126    | >                                              | 12.3                    | 1.31                  | >                     |
| 957      | NA-121    | ND                                             | ND                      | 2.33                  | >                     |
| 113      | NA-16     | >                                              | 0.45                    | >                     | >                     |
| 958      | NA-164    | >                                              | 2.47                    | >                     | >                     |
| 113      | NA-81     | >                                              | 2.47                    | >                     | >                     |
| 957      | NA-111    | ND                                             | ND                      | 9.84                  | >                     |
|          | NA-97     | >                                              | 22                      | 66.67                 | >                     |
| 958      | NA-175    | >                                              | >                       | >                     | >                     |
| 957      | NA-144    | >                                              | >                       | >                     | >                     |
| 113      | NA-37     | >                                              | >                       | >                     | >                     |
| 958      | NA-177    | >                                              | >                       | >                     | >                     |
| 958      | NA-152    | ND                                             | ND                      | ND                    | ND                    |
| Controls | Zanamivir | ND                                             | 7.33                    | 7.56                  | 1.93                  |
|          | rCR9114   | >                                              | >                       | ND                    | ND                    |
|          | H7.167    | 0.27                                           | ND                      | ND                    | ND                    |
|          | 2D22      | >                                              | >                       | >                     | >                     |

> indicates that activity was not detected when tested at concentrations as high as 20 µg/mL.

ND indicates not determined

\* NA-45 inhibits A/Shanghai/02/2013 H7N9 NA activity but IC<sub>50</sub> value is impossible to define since concentration response curve do not reach minimum at tested concentrations. See Figure 3C.
